# Supplementary material for: Biological Functions and Identification of Novel Biomarker Expressed on the Surface of Breast Cancer-Derived Cancer Stem Cells via Proteomic Analysis
Source: PubMed Central journal article supplement — Mol Cells. 2020 Apr 1;43(4):384–96. doi: 10.14348/molcells.2020.2230 (PMC7191048; doi:10.14348/molcells.2020.2230), 2020-04-01
Supplement: MolCe-43-384_Supple1.pdf [file MolCe-43-384_Supple1.pdf]

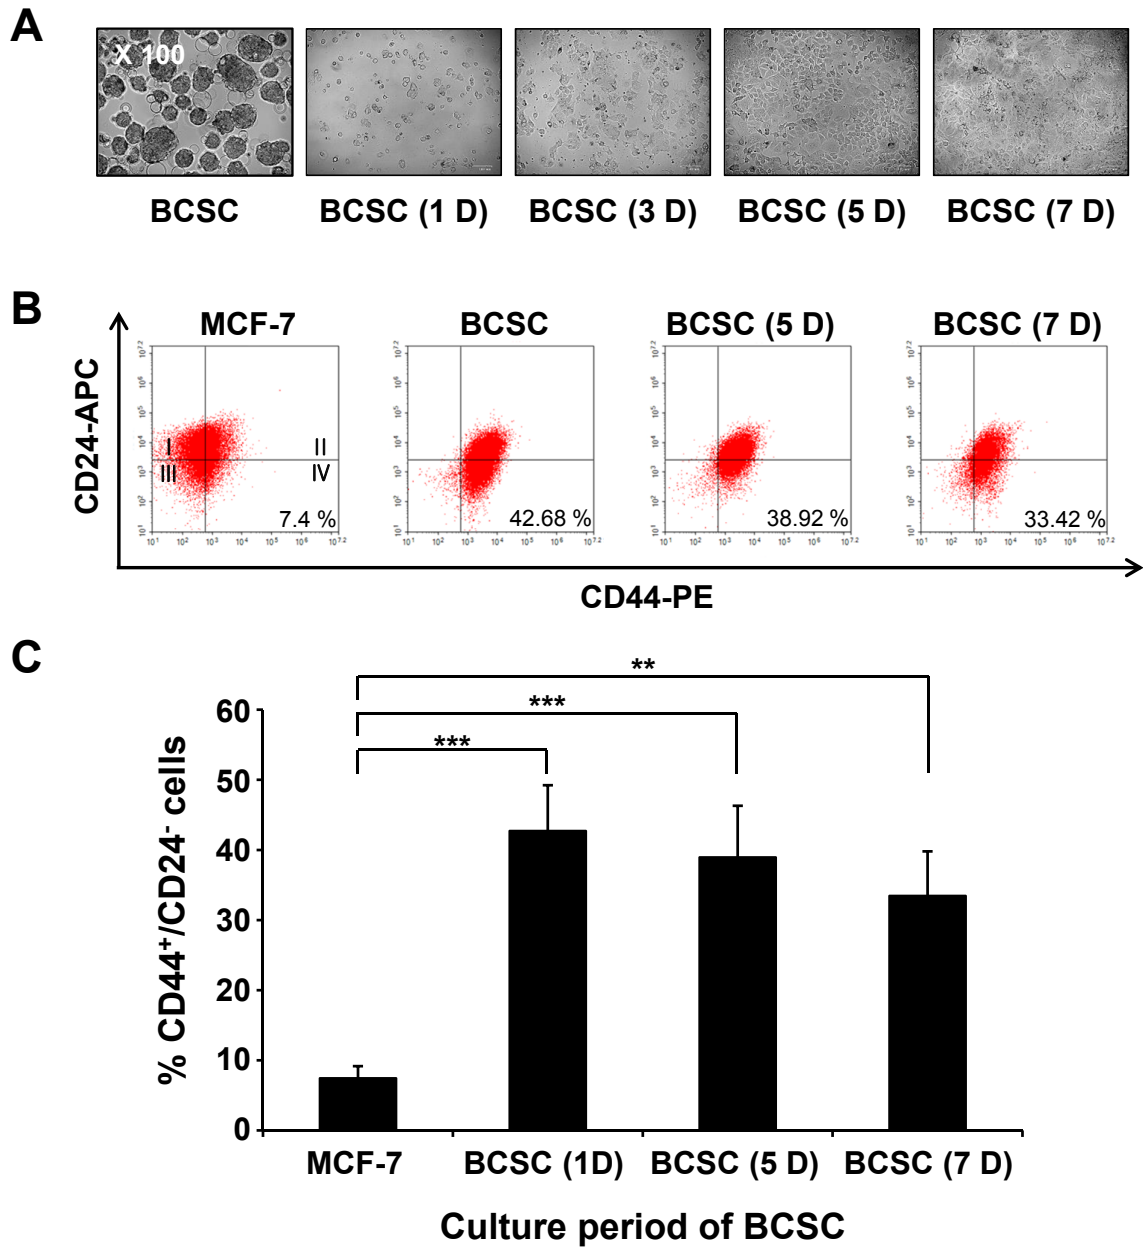

**Supplementary Fig. S1. Characterization of BCSCs cultured in adherent condition.** (A) Morphology images of BCSC observed by a bright-field microscope in each cultured time. (B) Flow cytometric analysis of the cells for CSC biomarker expression level of CD24<sup>+</sup>/CD44<sup>+</sup>. (C) Percentages of CD24<sup>+</sup>/CD44<sup>+</sup> expressing cell population analyzed by FACS. Data shown represent the mean  $\pm$  SD of three experiments (\*\* $P < 0.02$  and \*\*\* $P < 0.01$ ).

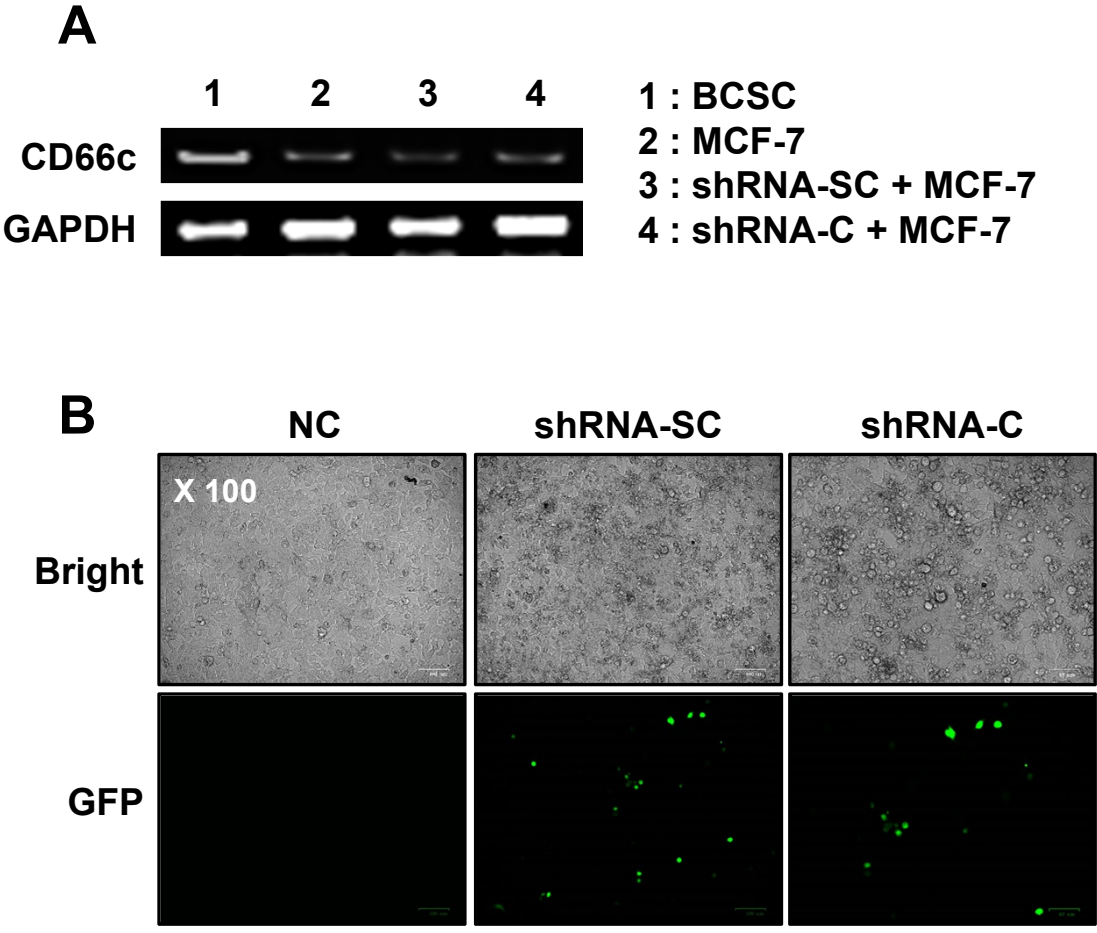

**Supplementary Fig. S2. The knock-down efficiency in CD66c low expressing MCF-7 treated with shRNA-C.** (A) Knock-down efficiency in BCSC- and MCF-7-treated with shRNA-C against CD66c. (B) GFP expression in MCF7 treated with shRNA-C expressing GFP.
